# Supplementary material
Source: publisher figshare collection journal article supplement (https://acs.figshare.com/ndownloader/files/3731965)
Supplement: Supplementary file 1 [file 3731965]

## *Supporting Information*

# A Multifunctional Fullerene Derivative for Interface Engineering in Perovskite Solar Cells

*Yaowen Li<sup>\*,‡</sup>, Yue Zhao,<sup>†</sup> Qi Chen,<sup>‡</sup> Yang (Michael) Yang,<sup>‡</sup> Yongsheng Liu,<sup>‡</sup> Ziruo Hong,<sup>\*,‡</sup>  
Zonghao Liu,<sup>‡</sup> Yao-Tsung Hsieh,<sup>‡</sup> Lei Meng,<sup>‡</sup> Yongfang Li,<sup>\*,†</sup> Yang Yang<sup>\*,‡</sup>*

*<sup>†</sup> Laboratory of Advanced Optoelectronic Materials, College of Chemistry, Chemical Engineering and Materials Science, Soochow University, Suzhou 215123, China*

*<sup>‡</sup> Department of Materials Science and Engineering, University of California, Los Angeles, California 90095, United States*

## Materials.

5-hydroxyisophthalic acid (99%), 4-dimethylaminopyridine (DMAP) (99%) were purchased from Chem Greatwall. PCC (Pyridinium Chlorochromate) (98%), octyl 2-cyanoacetate (99%) was purchased from J&K scientific Co., Ltd.  $\text{LiAlH}_4$  (97%) was purchased from Aladdin, p-toluenesulfonic acid (PTSA) (98%) and N,N-diisopropylcarbodiimide (DIPC) (98%) were purchased from Energy Chemical.  $\text{SiO}_2$ ,  $(\text{NH}_4)_2\text{HPO}_3$ ,  $\text{H}_2\text{SO}_4$ , HCl, anhydrous magnesium sulfate, methanol, ethyl acetate, petroleum ether, alcohol, toluene, dichloromethane, tetrahydrofuran, sodium hydrogen carbonate and o-dichlorobenzene were purchased from Sinopharm Chemical Reagent Co., Ltd. All of these except tetrahydrofuran were used without further purification. Tetrahydrofuran was dried over sodium, and distilled before use. [6,6]-phenyl- $\text{C}_{61}$ -butyric acid (PCBA) was synthesized according to the literature method.<sup>1,2</sup>

## Characterization.

### Device characterization

The area of devices is  $0.108 \text{ cm}^2$ .  $J$ - $V$  characteristics of photovoltaic cells were taken using a Keithley 2400 source measure unit under a simulated AM1.5G spectrum. With an Oriel 9600 solar simulator, the light intensity was calibrated by KG-5 Si diode. The  $J$ - $V$  measurements were carried out in nitrogen glove box. The devices were taken out of nitrogen glove box for external quantum efficiencies measurement and EQE was measured by Enli tech (Taiwan) measurement system. For transient photovoltage and current measurements, a white light bias was generated from an array of diodes (Molex 180081-4320) to simulate 0.5 sun bias light working condition. A pulsed red dye laser (Rhodamine 6G, 590nm) pumped by a nitrogen laser (LSI VSL-337ND-S) was used as the perturbation source, with a pulse width of 4 ns and a repetition frequency of 10 Hz. The intensity of the perturbation laser pulse was controlled to maintain the amplitude of transient  $V_{oc}$  below 5 mV so that the perturbation assumption of excitation light holds. The voltages under open circuit and currents under short circuit conditions were measured over a  $1 \text{ M}\Omega$  and a  $50 \Omega$  resistor, and were recorded on a digital oscilloscope (Tektronix DPO 4104B).

## Structure and optical characterization.

$^1\text{H}$  NMR spectra were measured using a Varian Mercury-400 NMR. Time-of-flight mass spectra were recorded with a Broker MALDI-TOF mass system. Thermal gravimetric analysis (TGA) was carried out on a Perkin-Elmer Pyris 6, with a heating rate of  $10\text{ }^\circ\text{C}/\text{min}$  under nitrogen flow. Differential scanning calorimetry (DSC) was performed under nitrogen flushing at a heating rate of  $10\text{ }^\circ\text{C}/\text{min}$  with a NETZSCH (DSC-204) instrument. Film thicknesses were measured using a KLA Tencor profilometer. Transmittance spectra were acquired on a Cary 6000i UV-vis-NIR spectrophotometer. X-ray diffraction pattern ( $2\theta$  scans) of perovskite deposited on the glass/ITO/ $\text{TiO}_2$  with and without PCBB-2CN-2C8 substrates were obtained by using an X-ray diffractometer (Panalytical X'Pert Pro) under  $\text{Cu-K}\alpha$  radiation ( $\lambda=1.54050\text{\AA}$ ). The data were collected from  $10$  to  $70^\circ$  ( $2\theta$ ) with a  $0.02^\circ$  step size. The SEM images were collected by using an emission SEM (The Nova 230 NanoSEM), where the electron beam accelerated in the range of  $500\text{V}$  to  $30\text{ kV}$ . SKPM was performed on  $\text{TiO}_2$  and  $\text{TiO}_2/\text{PCBB-2CN-C8}$  surfaces in air, and carried out on a Park XE-120 (Park Systems Corp. Suwon, Korea) atomic force microscopy using  $\text{Cr}/\text{Au}$  coated conducting tips (SC18, Mikromash Tallinn, Estonia) with a resonance frequency of approximately  $75\text{ kHz}$  and a spring constant of approximately  $2.8\text{ N/m}$ . An AC voltage ( $3\text{ V}$  in amplitude and  $10\text{ kHz}$  in frequency) is applied to the actuated cantilever, and the DC voltage applied to the tip that nullifies the tip-sample interaction is collected as the SP signal. Through a feedback loop, this electrostatic force was nullified by a DC bias applied to the tip, while the DC bias served as a direct measurement of the surface potential. Steady-state photoluminescence (PL) was analyzed using Horiba Jobin Yvon system with an excitation at  $640\text{ nm}$ . Time-resolved photoluminescence was obtained using the time correlated single-photon counting technique (Picoharp 300), and the excitation was provided by a picosecond diode laser at the wavelength of  $768\text{ nm}$  with a repetition frequency of  $1\text{ MHz}$  (PDL 800B).

**Table S1.** Values for TRPL characteristics of perovskite film on TiO<sub>2</sub> and TiO<sub>2</sub>/PCBB-2CN-2C8.

| ETL                            | $\tau_1$ | Ratio  | $\tau_2$ | Ratio |
|--------------------------------|----------|--------|----------|-------|
| TiO <sub>2</sub>               | 9.7      | 96.82% | 172      | 3.18% |
| TiO <sub>2</sub> /PCBB-2CN-2C8 | 3.6      | 99.98% | 63.2     | 0.02% |

$$\text{hysteresis index} = \frac{J_{RS}(0.8 V_{oc}) - J_{FS}(0.8 V_{oc})}{J_{RS}(0.8 V_{oc})} \quad (1)$$

**Equation (1):**  $J_{RS}(0.8 V_{oc})$  and  $J_{FS}(0.8 V_{oc})$  represent photocurrent density at 80% of  $V_{oc}$  for the reverse scan (RS) and forward scan (FS), respectively.

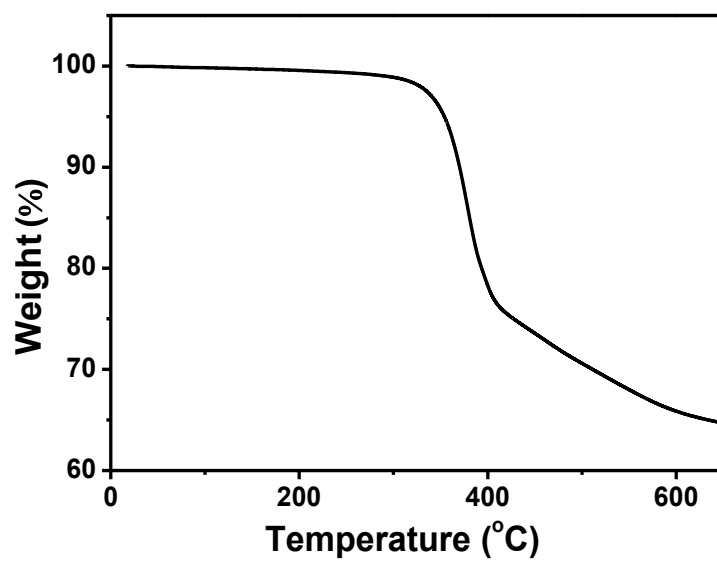

Figure S1. TGA thermogram of PCBB-2CN-2C8 at a heating rate of 10°C/min under N<sub>2</sub>.

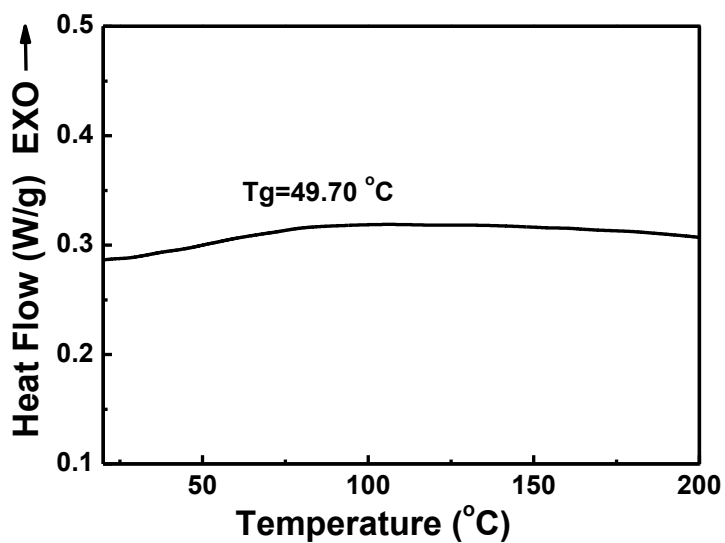

Figure S2. DSC analysis of PCBB-2CN-2C8 at a heating rate of 10 °C/min in N<sub>2</sub>.

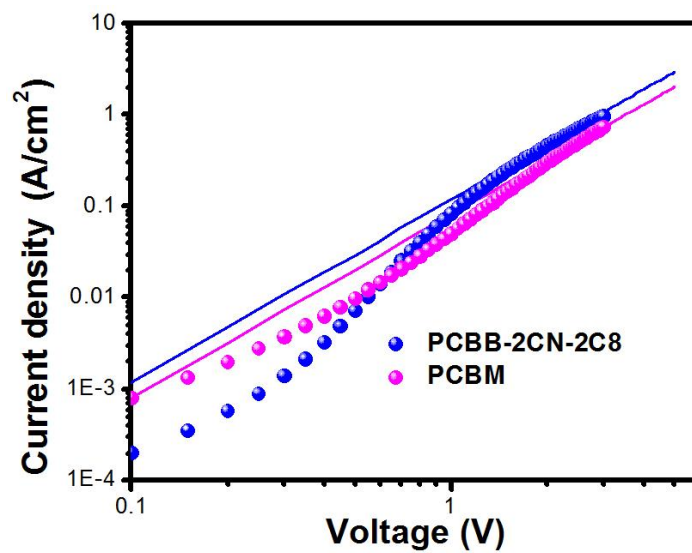

Figure S3.  $J$ - $V$  characteristics of the electron-only devices based on PCBB-2CN-2C8 and PCBM for comparison with the structure of ITO/ZnO/fullerene derivative/ZnO/Al.

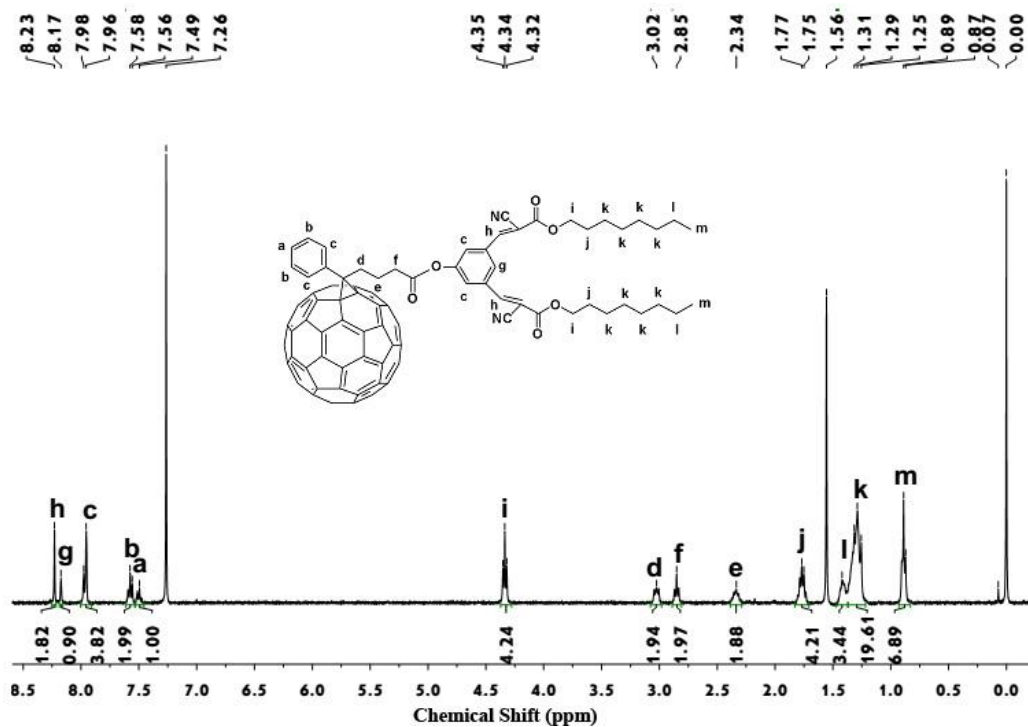

Figure S4.  $^1\text{H}$  NMR spectrum of PCBB-2CN-2C8

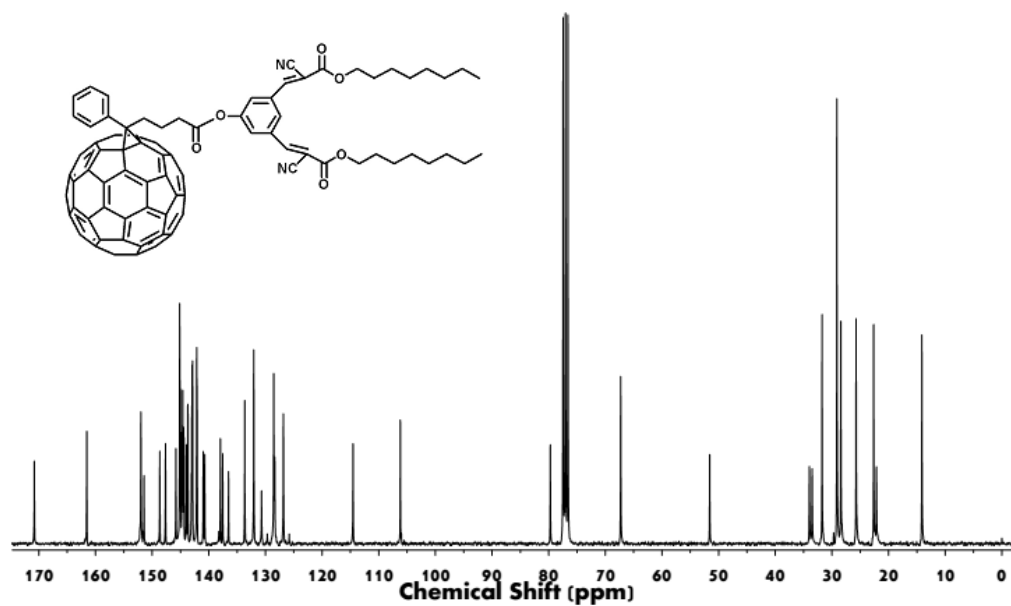

Figure S5.  $^{13}\text{C}$  NMR spectrum of PCBB-2CN-2C8

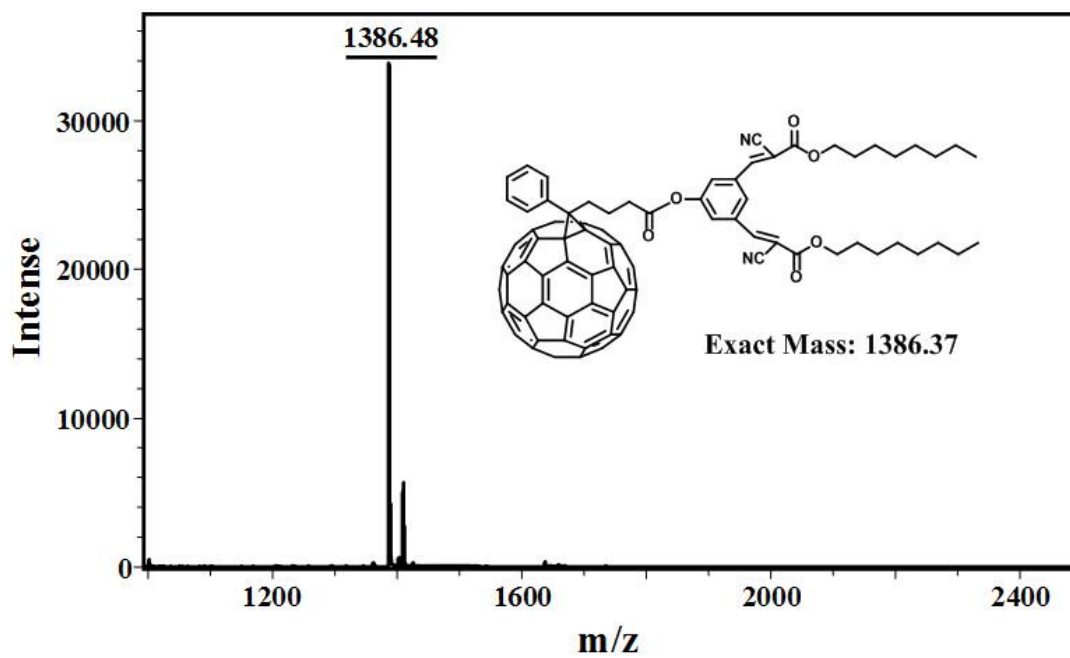

Figure S6. MALDI- TOF mass spectrum of PCBB-2CN-2C8.

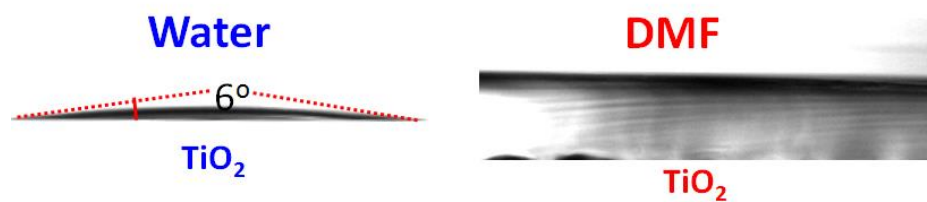

Figure S7. The images of water and DMF droplets contact angles on  $\text{TiO}_2$  surfaces.

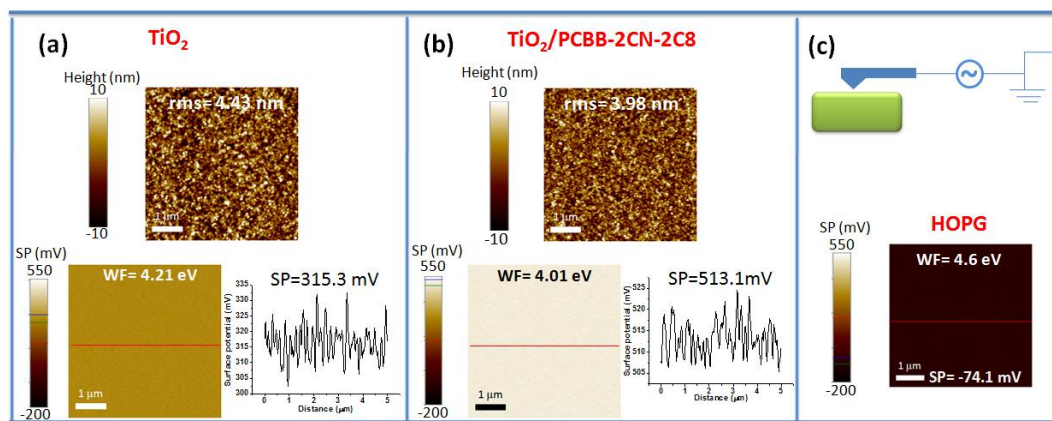

Figure S8. The AFM height and SKPM images of  $\text{TiO}_2$  and  $\text{TiO}_2/\text{PCBB-2CN-2C8}$  surfaces with their corresponding root-mean-square (rms), surface potential (SP) and work function (WF); (a) on  $\text{TiO}_2$ . (b) on  $\text{TiO}_2/\text{PCBB-2CN-2C8}$ . (c) on highly ordered pyrolytic graphite (HOPG) as standard sample.



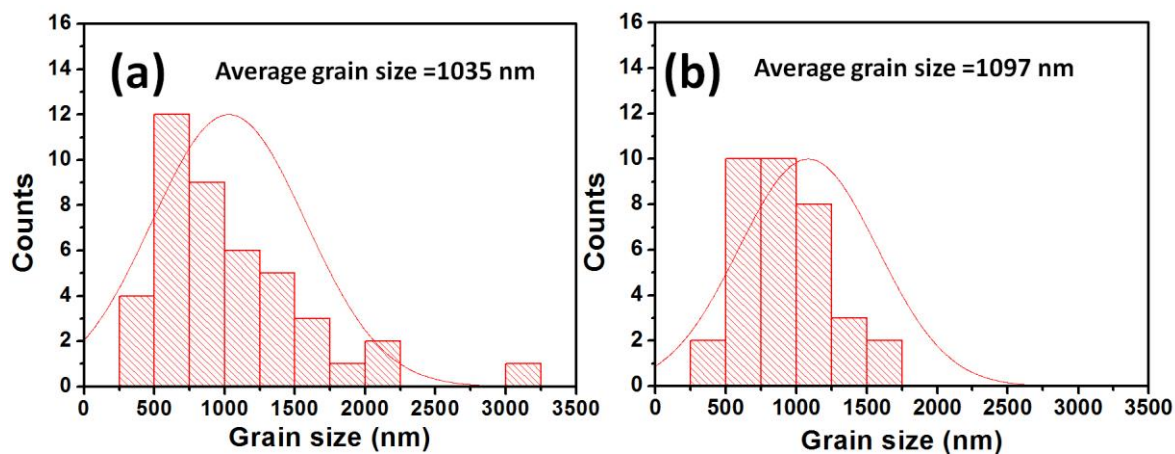

Figure S9. Grain size distribution of the perovskite film spin-coated on varied substrate: (a) on  $\text{TiO}_2$ ; (b) on  $\text{TiO}_2/\text{PCBB-2CN-2C8}$ .

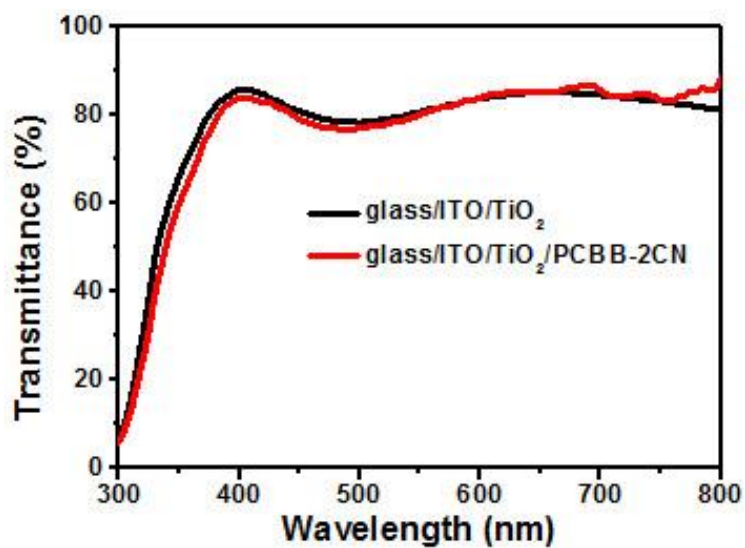

Figure S10. Transmittance spectra of glass/ITO substrates coated with  $\text{TiO}_2$  or  $\text{TiO}_2/\text{PCBB-2CN-2C8}$ .

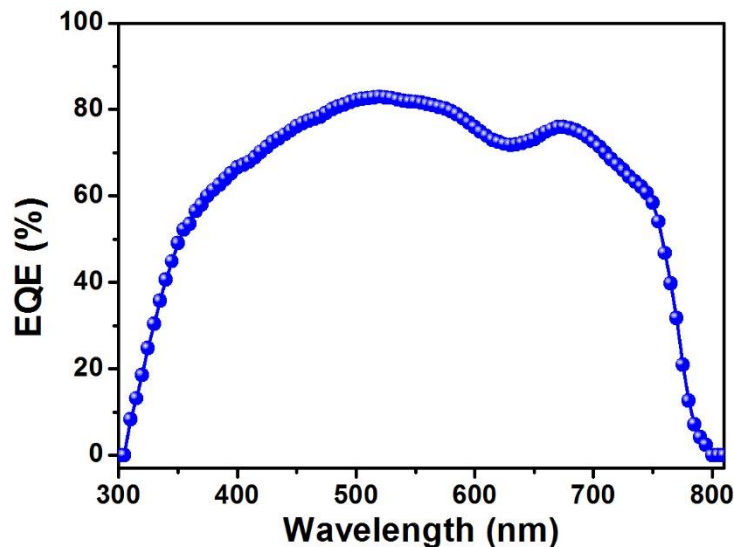

Figure S11. EQE spectrum of perovskite solar cell based on  $\text{TiO}_2/\text{PCBB-2CN-2C8}$  ETL.

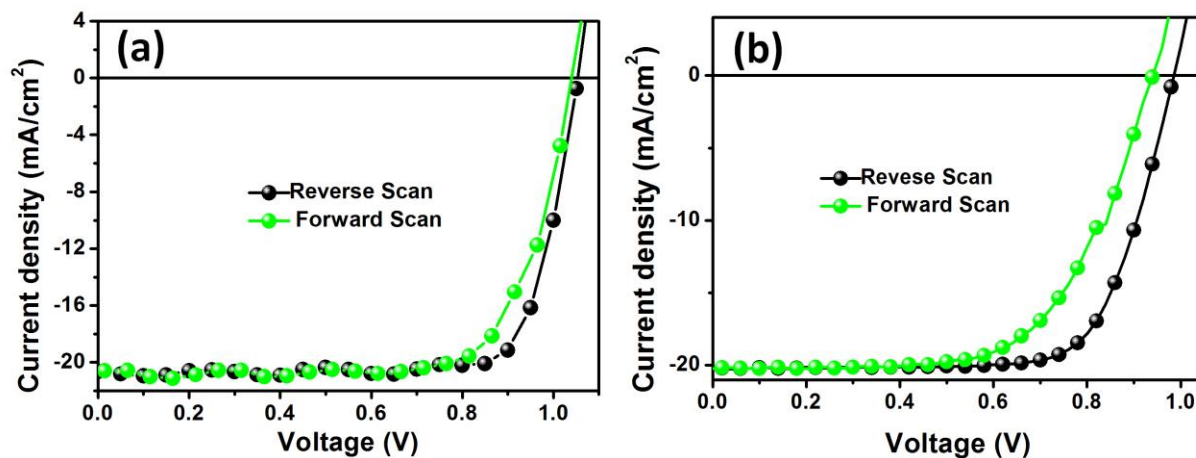

Figure S12.  $J$ - $V$  curves in reverse and forward scan measured under  $100 \text{ mW/cm}^2$  AM 1.5G illumination with the structure of glass/ITO/ $\text{TiO}_2$ /with or without PCBB-2CN-2C8/ $\text{CH}_3\text{NH}_3\text{PbI}_3$ /spiro-OMeTAD/Au: (a)  $\text{TiO}_2/\text{PCBB-2CN-2C8}$  ETL based perovskite solar cell; (b)  $\text{TiO}_2$  ETL based perovskite solar cell. Forward scan:  $0 \text{ V} \rightarrow 1.2 \text{ V}$ , scan rate  $200 \text{ mV/s}$ , delay time  $100 \text{ ms}$ ; Reverse scan:  $1.2 \text{ V} \rightarrow 0 \text{ V}$ , scan rate  $200 \text{ mV/s}$ , delay time  $100 \text{ ms}$ .

## REFERENCES

- (1) Zhang, P.; Li, C.; Li, Y.; Yang, X.; Chen, L.; Xu, B.; Tian, W.; Tu, Y. *Chemical Communications* **2013**, 49, 4917.
- (2) Hummelen, J. C.; Knight, B. W.; LePeq, F.; Wudl, F.; Yao, J.; Wilkins, C. L. *The Journal of Organic Chemistry* **1995**, 60, 532.
